# Supplementary material
Source: Springer Nature journal article supplement (https://www.springermedizin.de/resource/supplementary/12874_2008_325_MOESM6_ESM.pdf/9434404)

**clinic 2**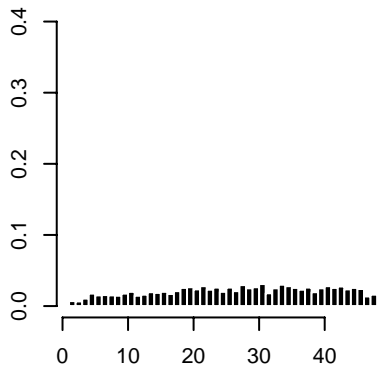**clinic 4**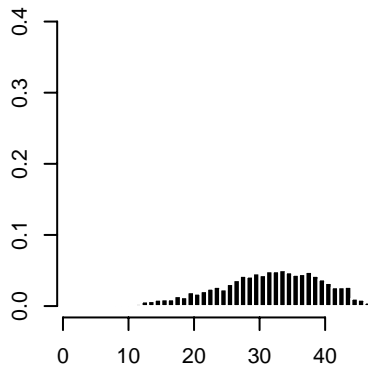**clinic 7**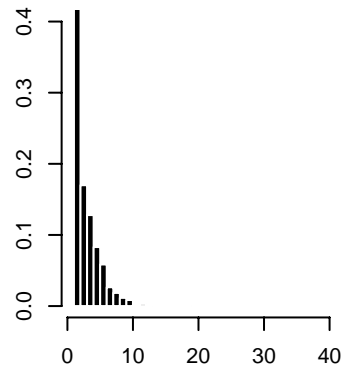**clinic 17**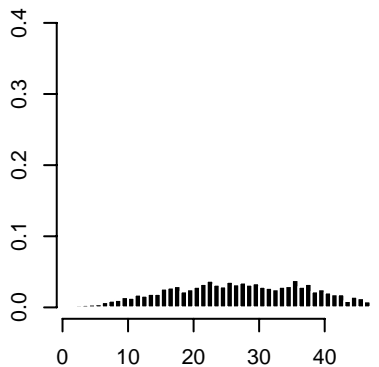**clinic 20**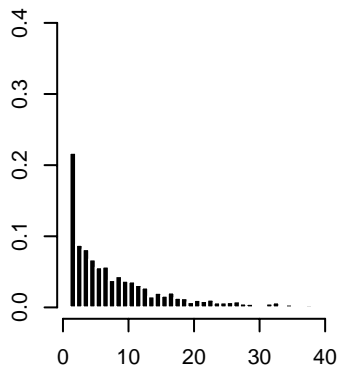**clinic 25**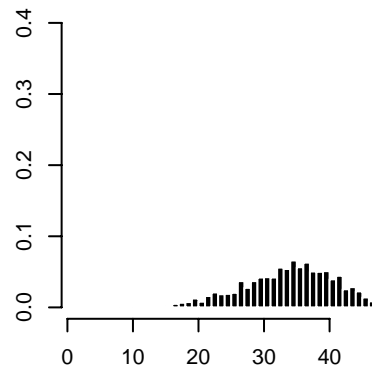**clinic 26**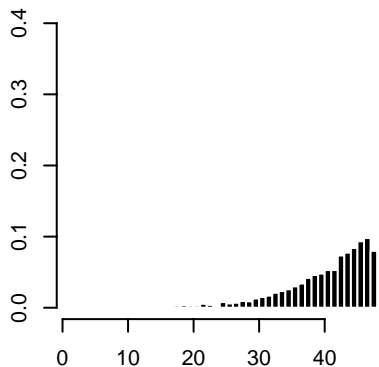**clinic 31**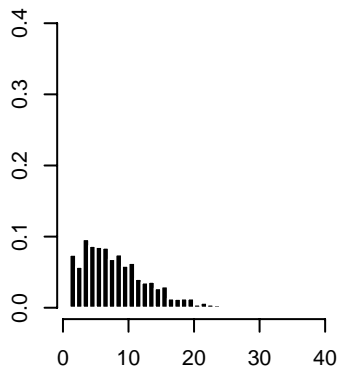**clinic 40**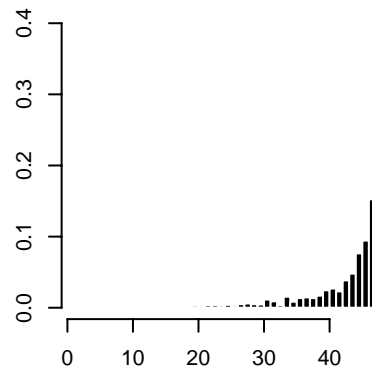

Supplement: MOESM6 [file 9434404]
